# Supplementary material for: The TGFβ→TAK1→LATS→YAP1 Pathway Regulates the Spatiotemporal Dynamics of YAP1
Source: PubMed Central journal article supplement — Mol Cells. 2023 Sep 13;46(10):592–610. doi: 10.14348/molcells.2023.0088 (PMC10590711; doi:10.14348/molcells.2023.0088), 2023-09-13
Supplement: molce-46-10-592-supple1.pdf [file molce-46-10-592-supple1.pdf]

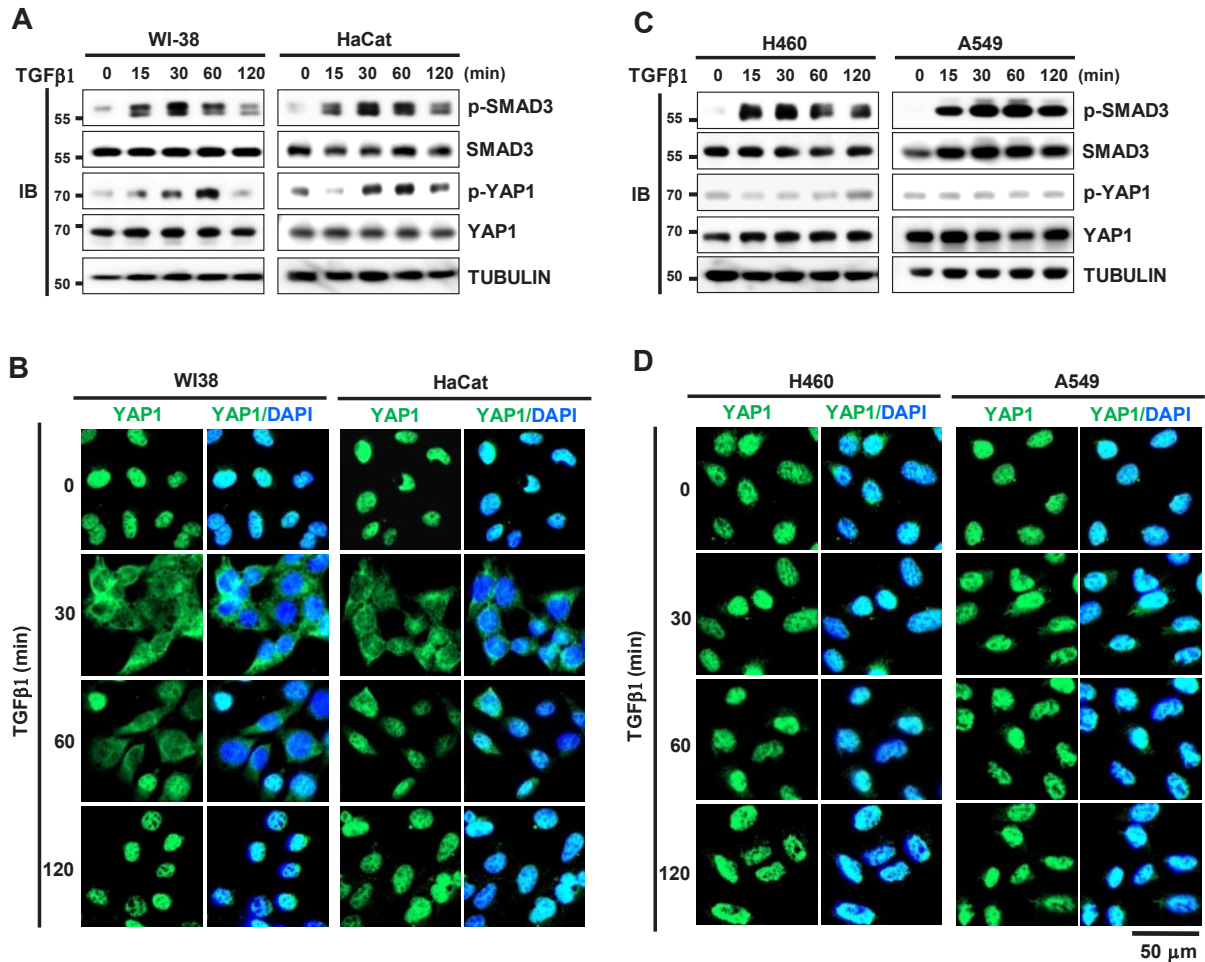

**Fig. S1. TGFβ stimulation triggers nuclear-cytoplasmic shuttling of YAP1.**

(A) Immortalized normal cell lines [WI-38 (lung fibroblast) and HaCaT (keratinocyte)] were stimulated with TGFβ1. Time-dependent phosphorylation of SMAD3 and YAP1 at various time points was analyzed by immunoblotting (IB).

(B) The cell lines were stimulated with TGFβ1 and time-dependent subcellular localization of YAP1 was analyzed by double immunofluorescence staining (green=YAP1; blue=DAPI).

(C) Cancer cell lines [H460 (human lung cancer) and A549 (human lung cancer)] were stimulated with TGFβ1. Time-dependent phosphorylation of SMAD3 and YAP1 were analyzed by IB.

(D) The cell lines were stimulated with TGFβ1 and time-dependent subcellular localization of YAP1 was analyzed by double immunofluorescence staining (green=YAP1; blue=DAPI).

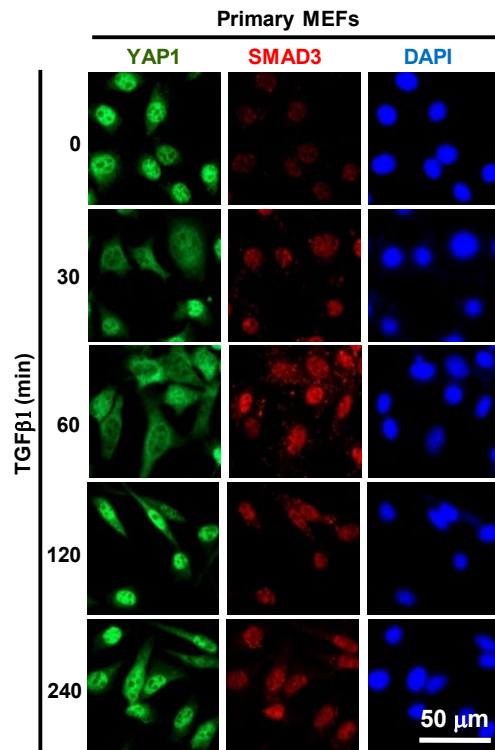

**Fig. S2. Subcellular localization of YAP1 and SMAD3 in response to TGF $\beta$  stimulation**  
Primary MEFs were stimulated with TGF $\beta$ 1. Time-dependent subcellular localization of YAP1 and SMAD3 at the indicated time points was analyzed by triple immunofluorescence staining (green=YAP1/TAZ; red=SMAD3; blue=DAPI).

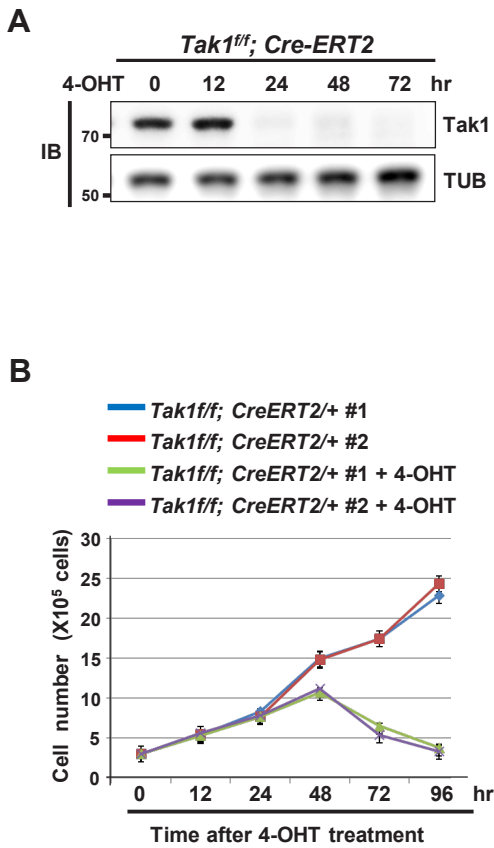

**Fig. S3. Deletion of *Tak1* from *Tak1<sup>fl/f</sup>; Cre-ERT2* MEFs.**

(A) *Cre-ERT2* is activated by treatment with 4-hydroxy-tamoxifen (4-OHT) and deletes the floxed gene. *Tak1<sup>fl/f</sup>; Cre-ERT2* MEFs were treated with 4-OHT, and deletion of *Tak1* was analyzed by measuring expression of the Tak1 protein by IB at the indicated time points. The results revealed that *Tak1* was completely deleted 24 h after 4-OHT treatment.

(B) *Tak1<sup>fl/f</sup>; Cre-ERT2* MEFs were treated with vehicle or 4-OHT, and cell viability was measured at the indicated time points. MEF clones are denoted as #1 and #2.

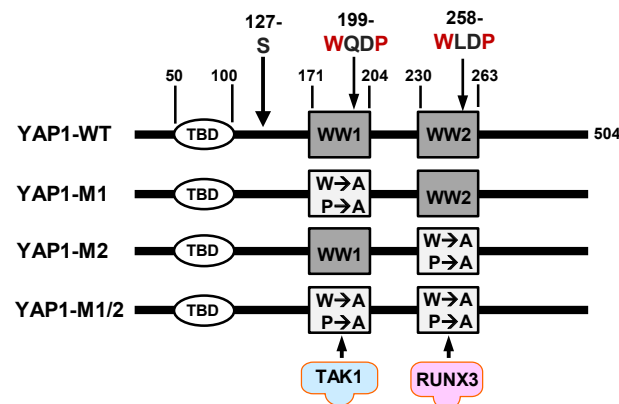

**Fig. S4. Schematic illustration of YAP1 mutants.**

*Flag-YAP1-M1* (a WW1 domain-disrupted YAP1 mutant; W199A and P202A), *Flag-YAP1-M2* (a WW2 domain-disrupted YAP1 mutant; W258A and P261A), or *Flag-YAP1-M1/2* (a mutant in which the YAP1 WW1 and WW2 domains are disrupted) are shown.

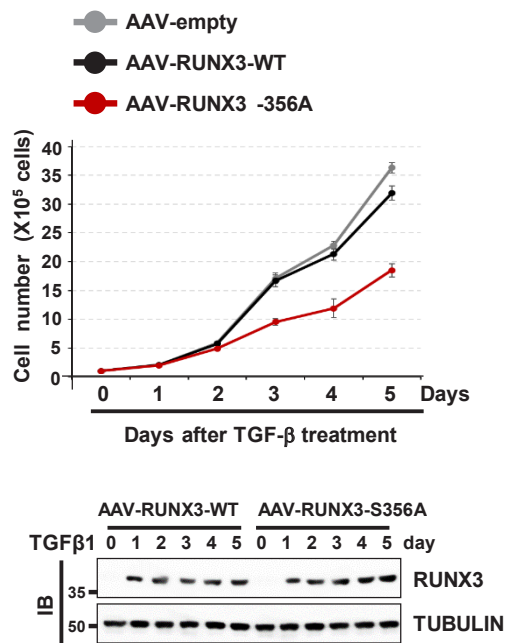

**Fig. S5. Role of TGF $\beta$ -RPA-AC in cell cycle regulation.**

HEK293 cells were infected with AAV-RUNX3-WT, AAV- RUNX3-S356A or control AAV-empty and the proliferation rate of the cells were measured. Expressions of RUNX3-WT and RUNX3-S356A were detected by IB.

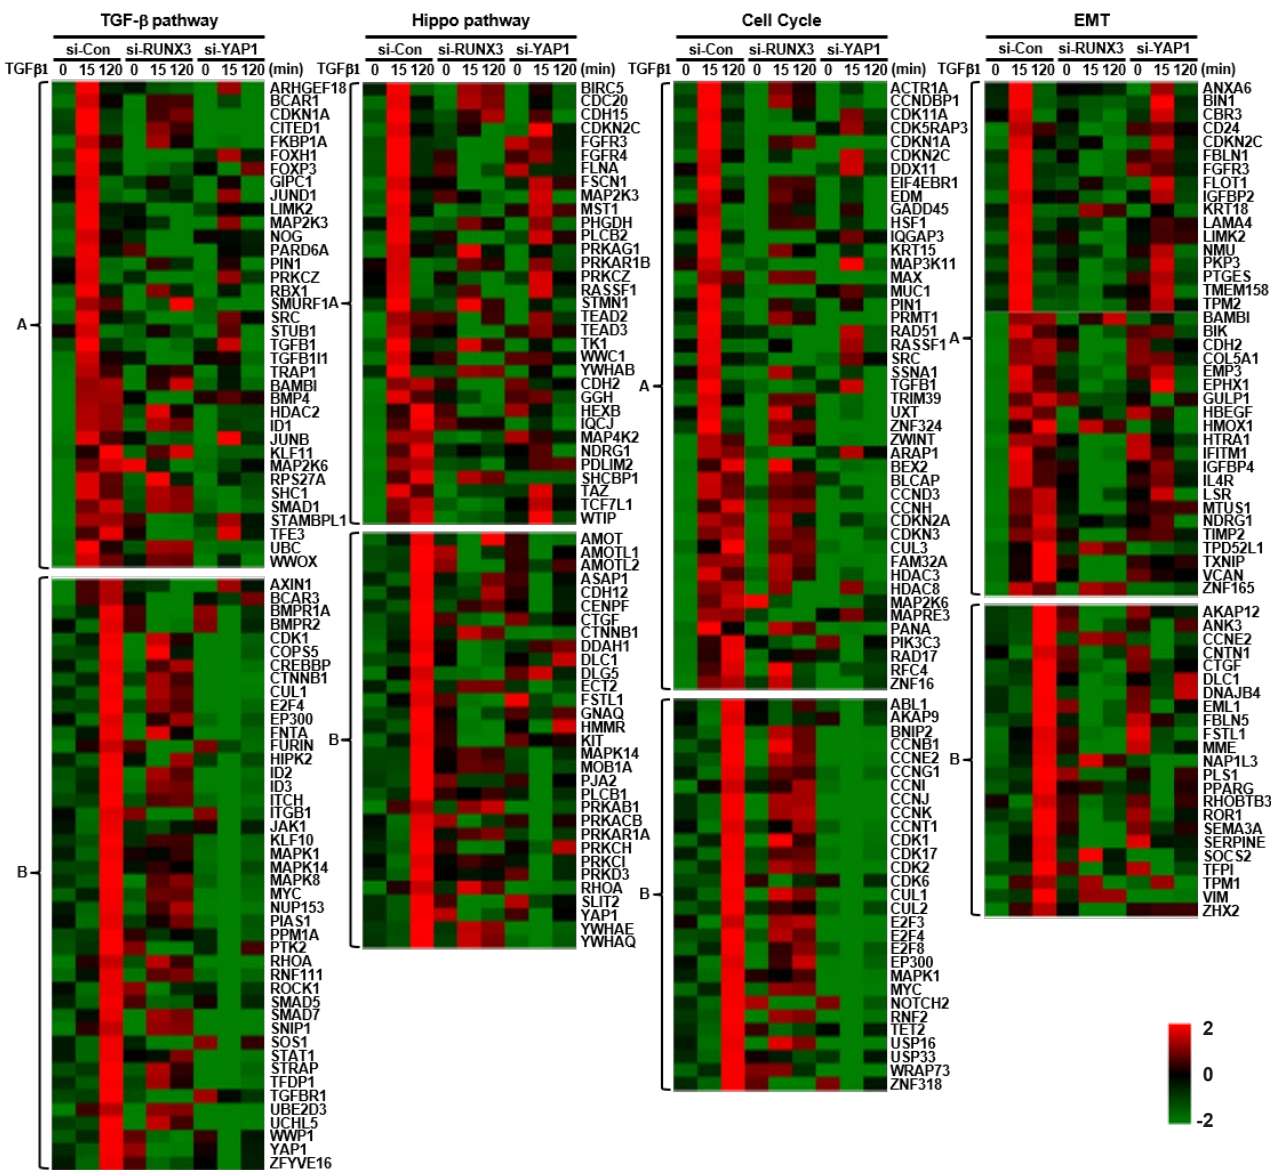

**Fig. S6. Biphasic roles of YAP1 in regulating target genes of TGFβ signaling.**

Heatmap showing genes upregulated after TGFβ1 stimulation of HEK293 cells, and gene expression levels in si-RUNX3 or si-YAP1-treated cells. The categories of TGFβ-induced YAP1-dependent genes include the “TGFβ pathway”, the “Hippo pathway”, “cell cycle regulation”, and “epithelial-mesenchymal transition (EMT)”. Early and late genes are indicated by A and B, respectively

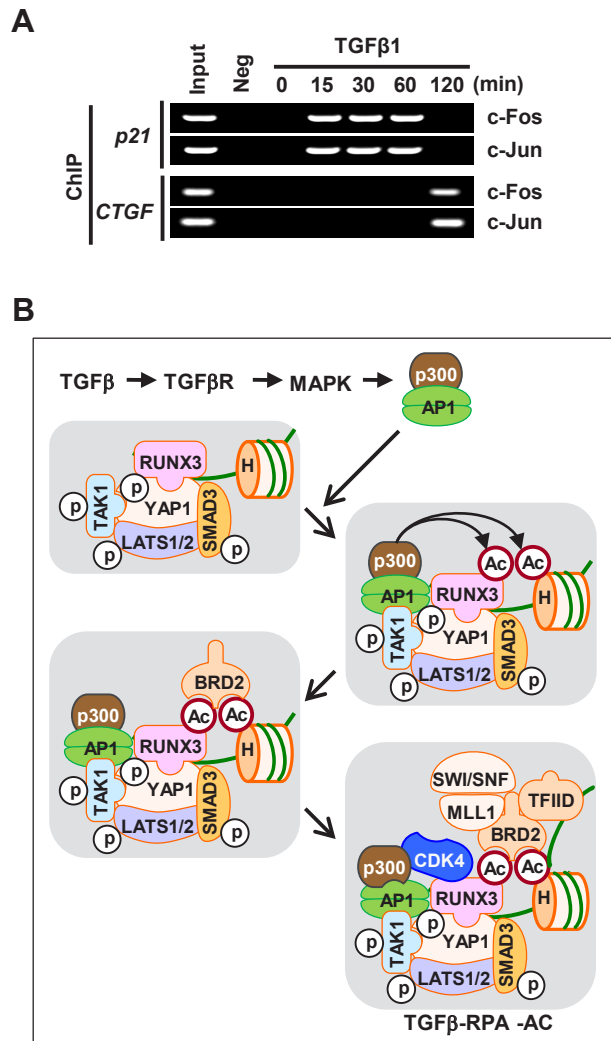

**Fig. S7. AP1 is an essential component of the TGF $\beta$ -RPA-AC complex.**

**(A)** HEK293 cells were stimulated with TGF $\beta$ 1. The binding of c-FOS and c-JUN to the *p21* or *CTGF* locus was measured by ChIP at the indicated time points. One-thirtieth of the lysates was used as the as input for PCR.

**(B)** Schematic illustration of the role of AP1/p300 in TGF $\beta$ -RPA-AC complex formation.
